# Supplementary figures and images for: Dynamic Mechanical and Biological Characterization of New 3D-Printed Polymeric Dental Materials: A Preliminary Study
Source: MDPI journal article supplement (doi:10.3390/prosthesis6020020), 2024-03-15

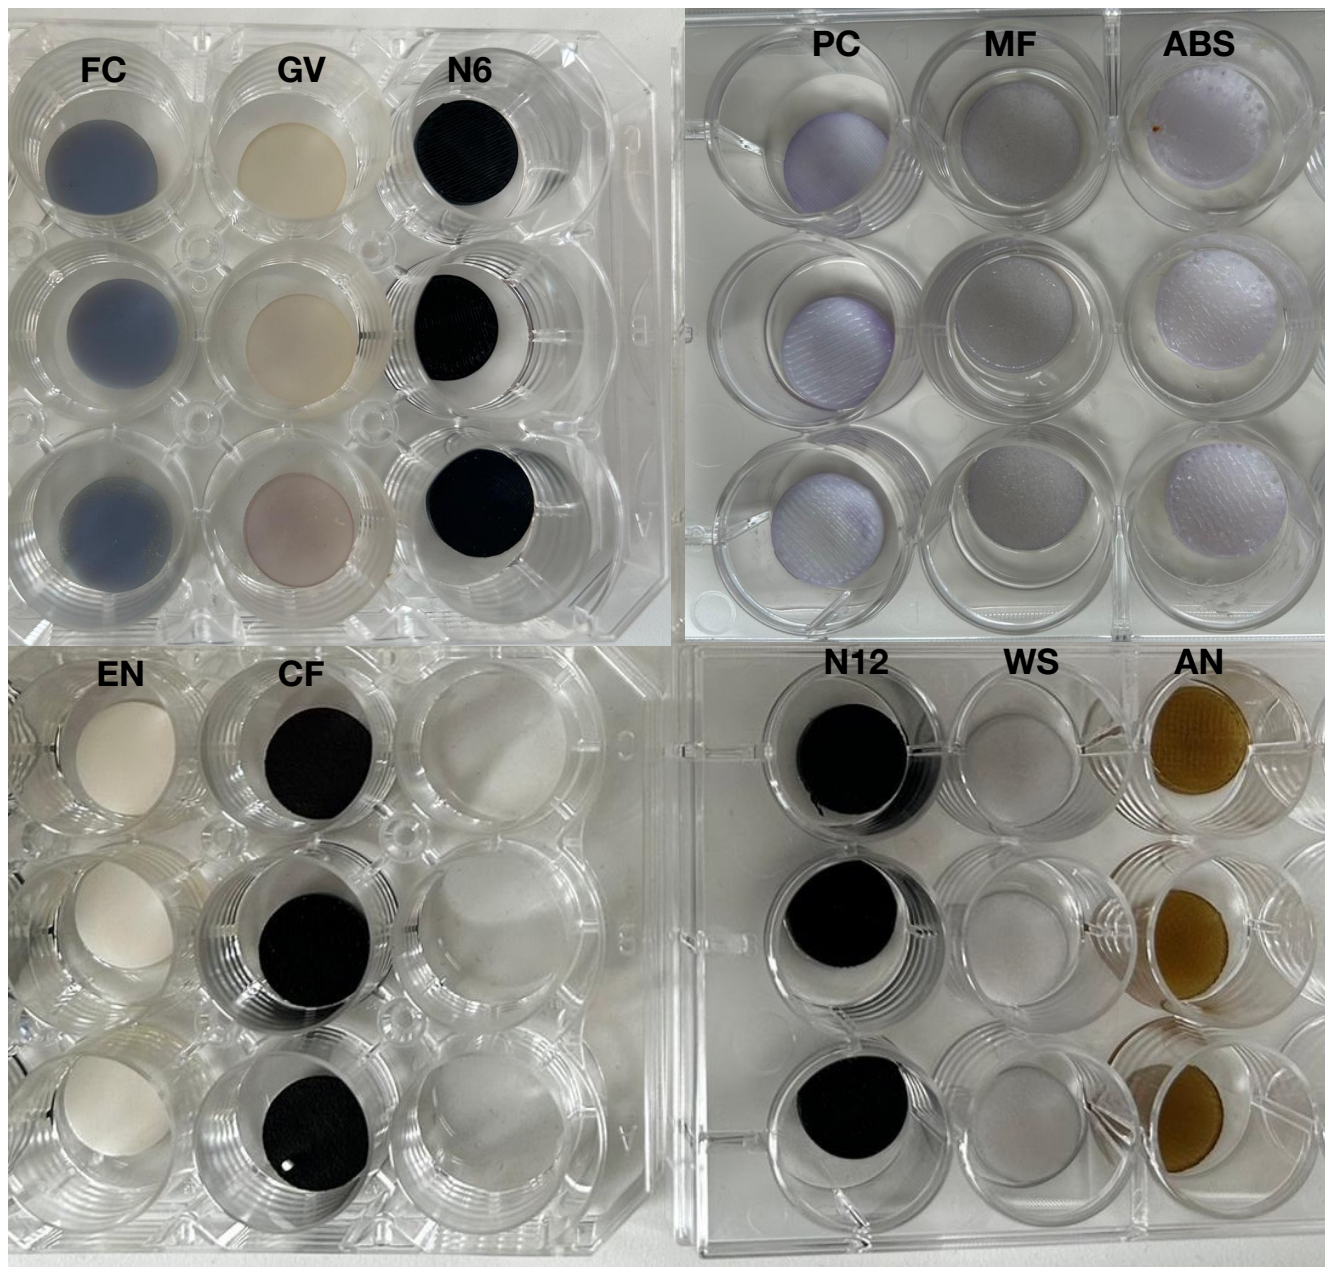

Supplement: s1 [file s1]

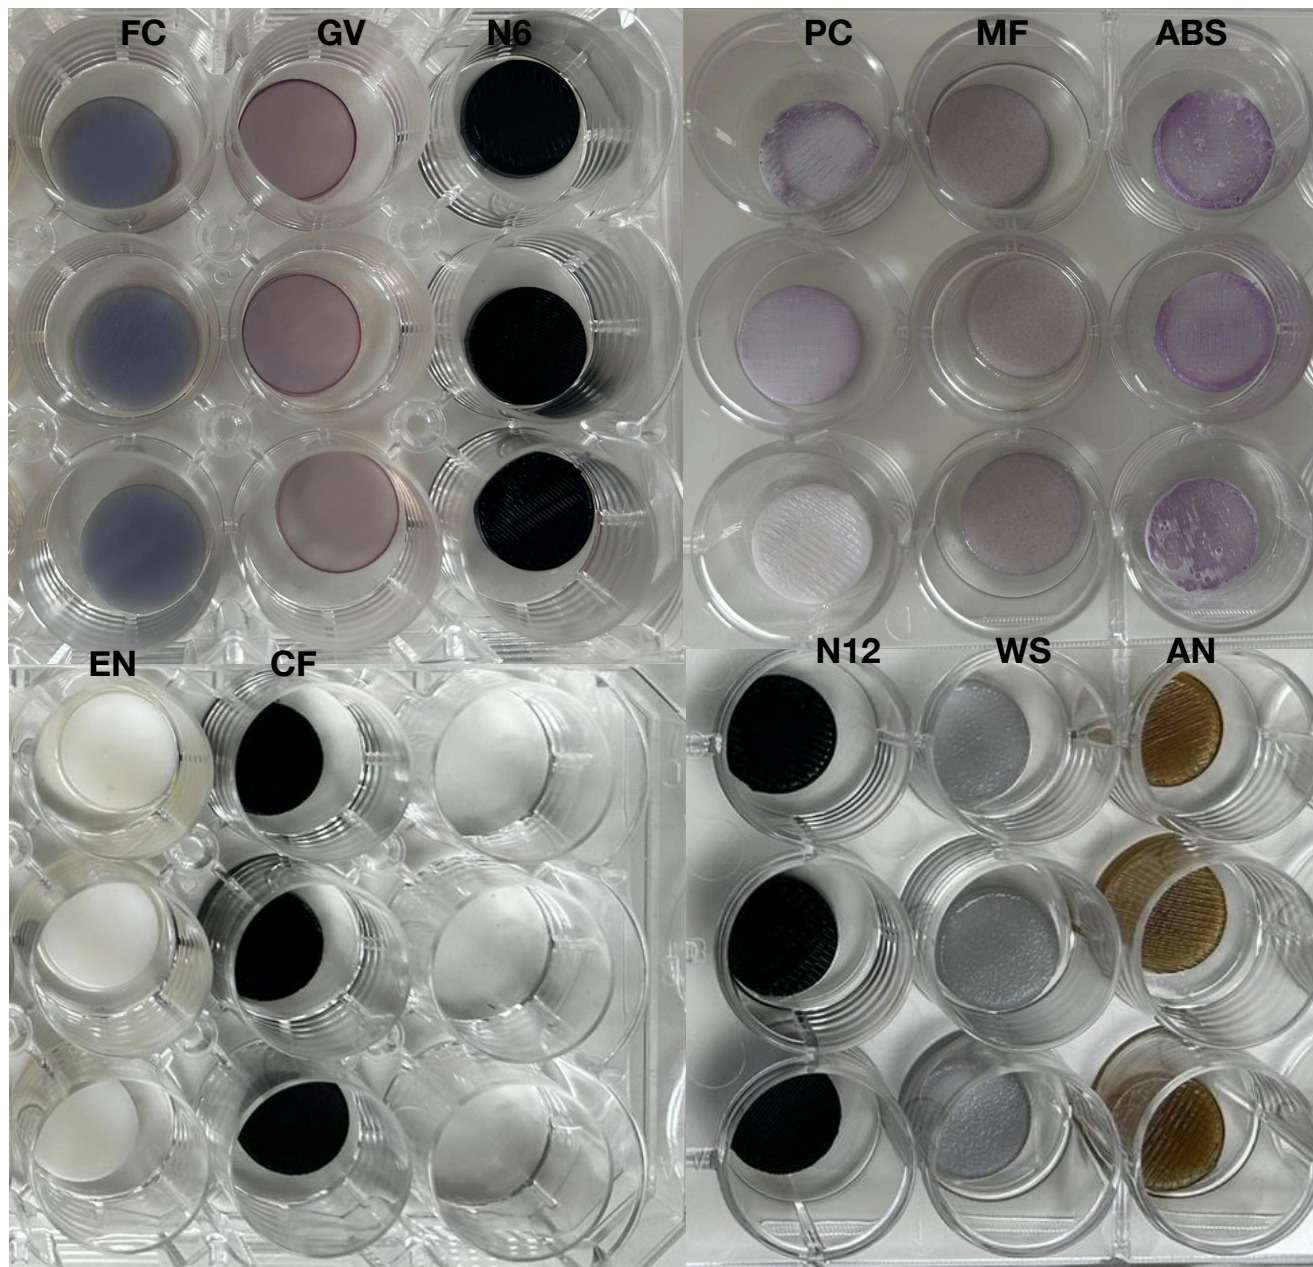

Supplement: s1 [file s1]

3h

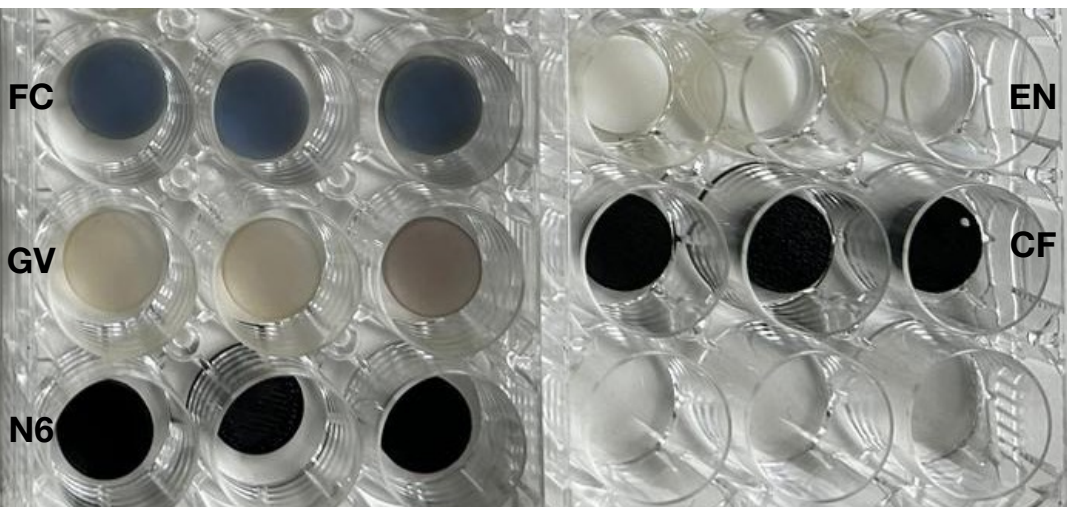

3h

3h

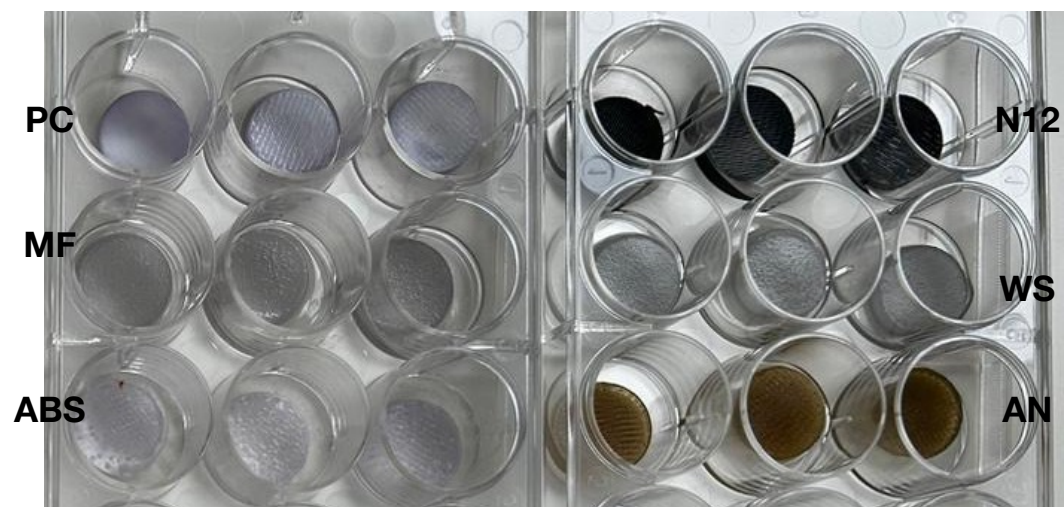

3h

24h

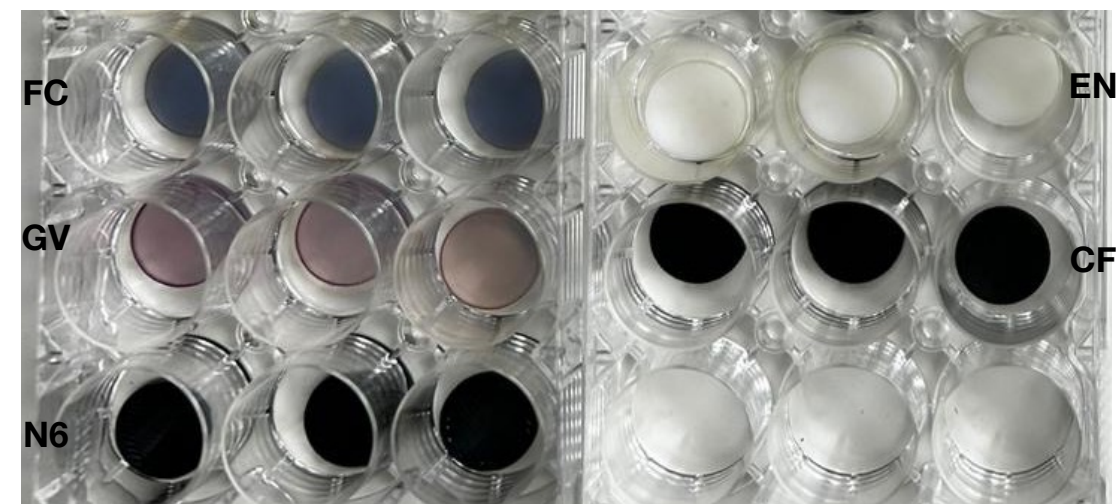

24h

24h

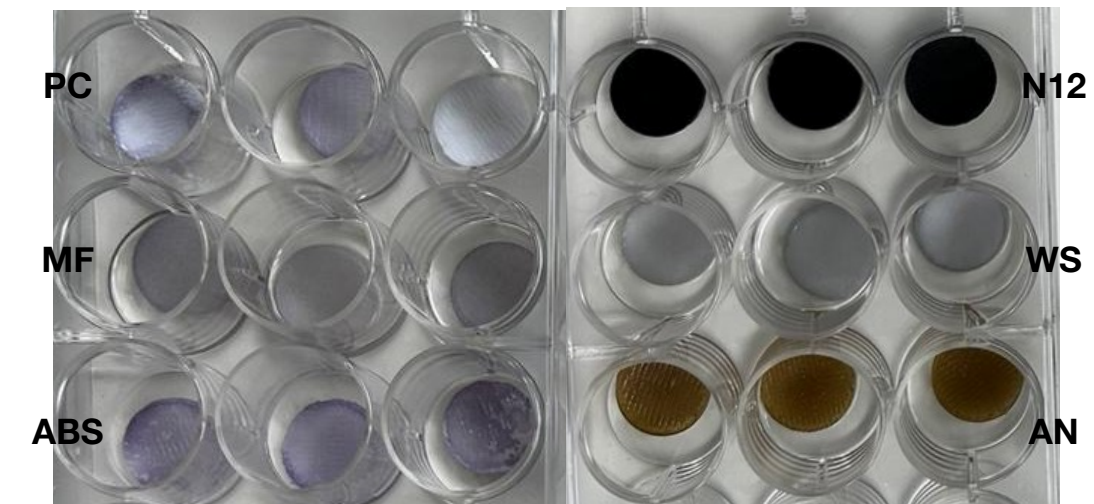

24h

Supplement: s1 [file s1]

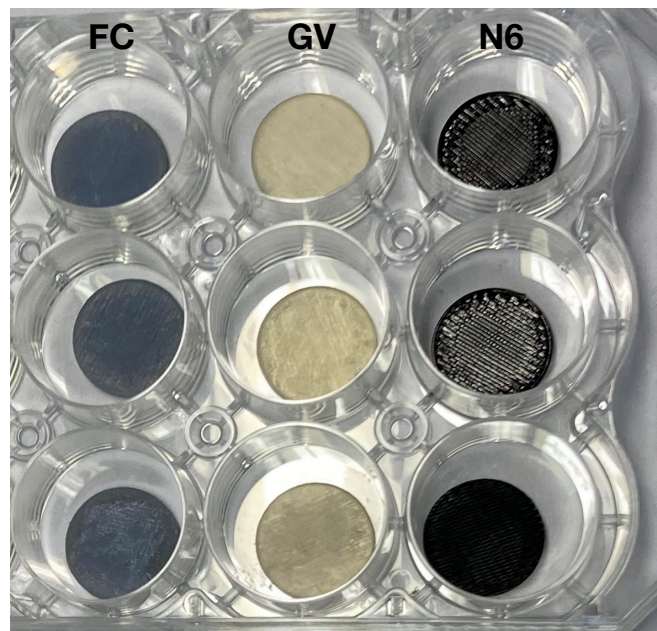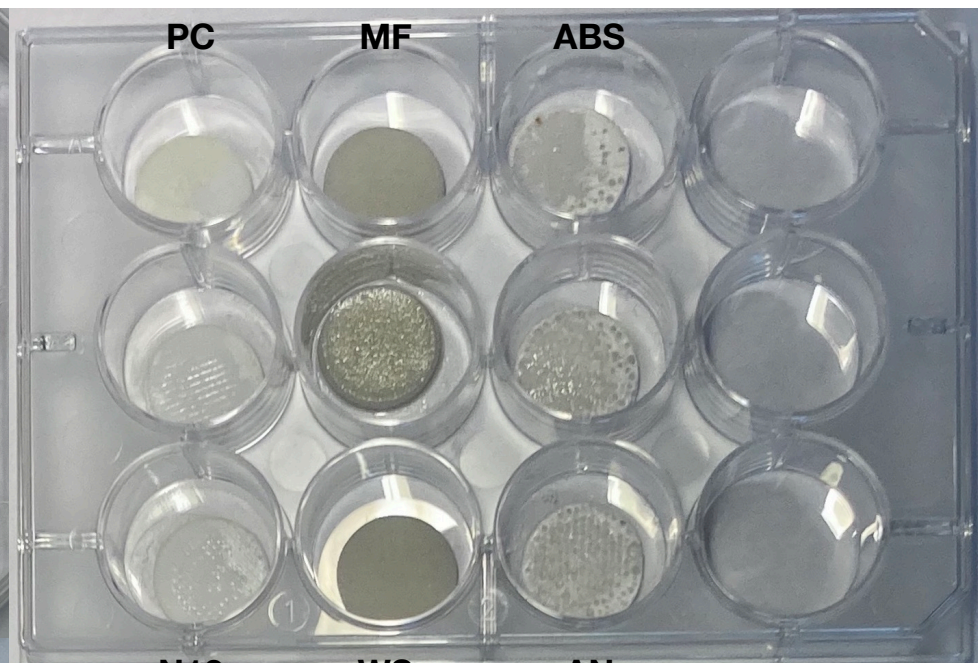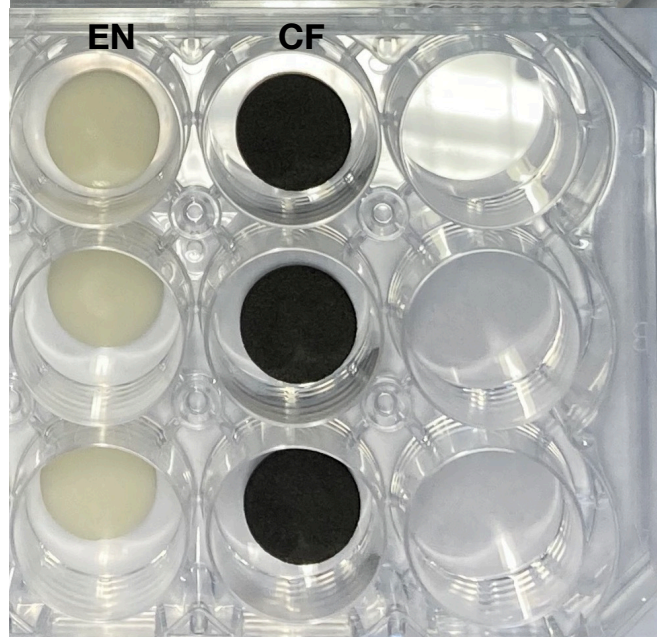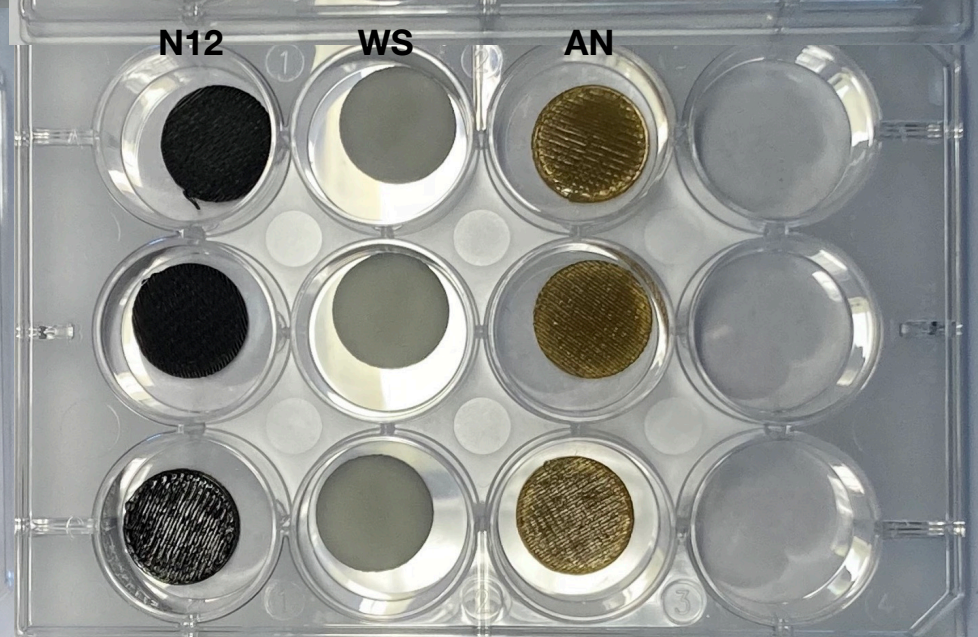

Supplement: s1 [file s1]
